# Supplementary material
Source: Springer Nature journal article supplement (http://www.springermedizin.de/resource/supplementary/13054_2013_2238_MOESM1_ESM.pdf/9713920)

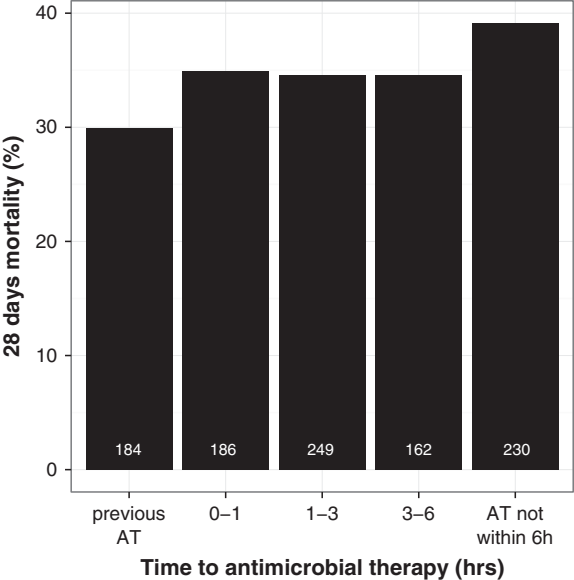

Supplement: MOESM1 [file 9713920]
